# Supplementary material for: The effect of copper on the redox behaviour of iron oxide for chemical-looping hydrogen production probed by in situ X-ray absorption spectroscopy
Source: Royal Society of Chemistry journal article supplement (doi:10.1039/c8cp01309h), 2018-01-01
Supplement: c8cp01309h1.pdf [file c8cp01309h1.pdf]

## Supplementary file

### **The effect of copper on the redox behaviour of iron oxide for chemical-looping hydrogen production probed by *in situ* X-ray absorption spectroscopy**

**Nur Sena Yüzbasi<sup>1</sup>, Paula M. Abdala<sup>1</sup>, Qasim Imtiaz<sup>1</sup>, Sung Min Kim<sup>1</sup>, Agnieszka M. Kierzkowska<sup>1</sup>, Andac Armutlulu<sup>1</sup>, Wouter van Beek<sup>2</sup> and Christoph R. Müller<sup>1,\*</sup>**

<sup>1</sup>**Laboratory of Energy Science and Engineering, Department of Mechanical and Process Engineering, ETH Zürich, 8092 Zürich, Switzerland**

<sup>2</sup>**Swiss Norwegian Beamlines, European Synchrotron Radiation Facility (ESRF), Grenoble, France**

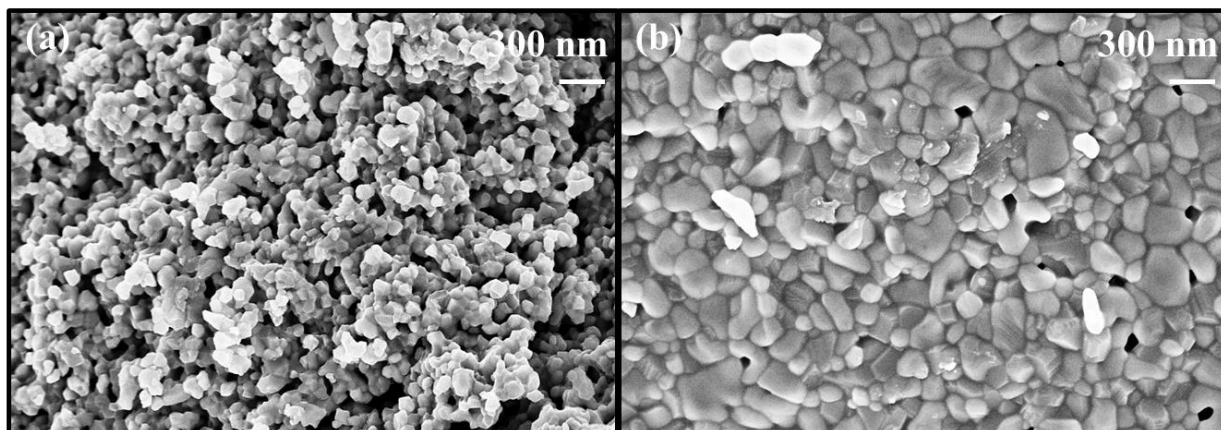

**Figure S1:** Scanning electron micrographs of the calcined oxygen carriers (a) Fe<sub>30</sub>Zr<sub>70</sub> and (b) Fe<sub>30</sub>Cu<sub>10</sub>Zr<sub>60</sub>.

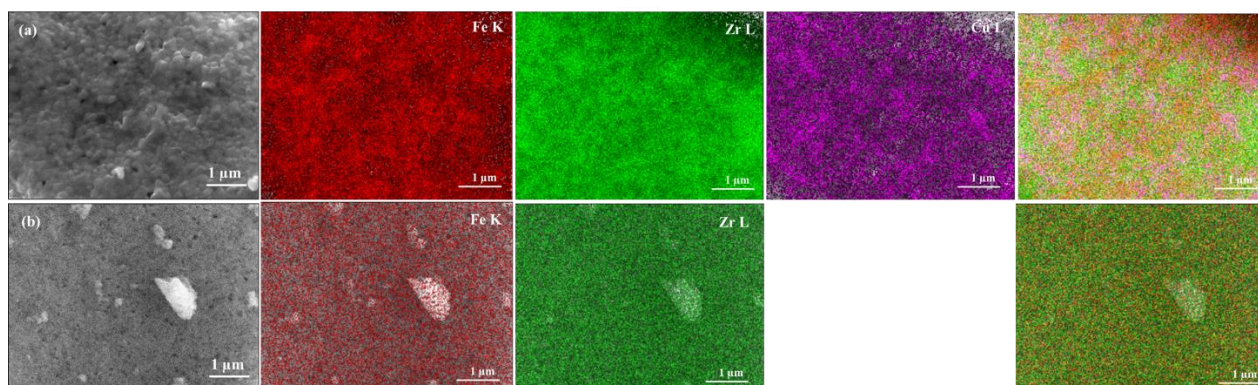

**Figure S2:** EDX maps of calcined (a) Fe<sub>30</sub>Zr<sub>70</sub> and (b) Fe<sub>30</sub>Cu<sub>10</sub>Zr<sub>60</sub>, Copper, zirconium and iron are represented with the colours pink, green and red, respectively.

*Oxidation in steam*

*Oxidation in O<sub>2</sub>*

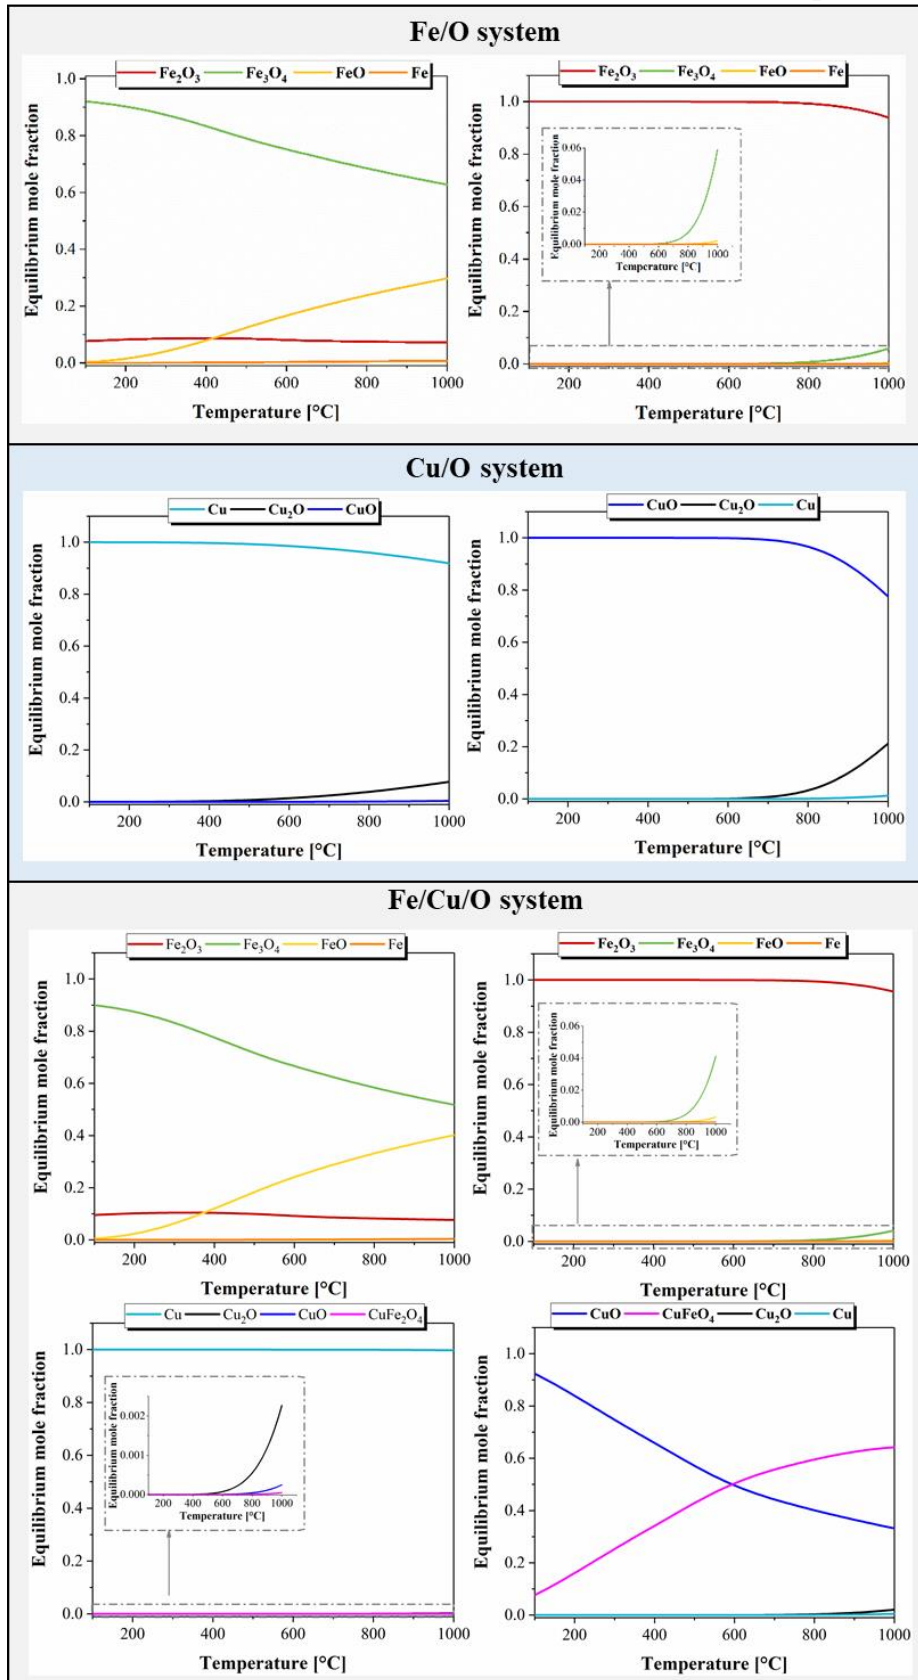

**Figure S3:** Equilibrium thermodynamics calculations for the Fe/O, Cu/O and Fe/Cu/O systems during oxidative (steam and oxygen) conditions (molar ratio Fe:Cu = 3:1).

A thermodynamic evaluation of the materials is given in Figure S3. The equilibrium mole fractions of the different phases considered (Cu, Cu<sub>2</sub>O, CuO, CuFe<sub>2</sub>O<sub>4</sub>, Fe<sub>2</sub>O<sub>3</sub>, Fe<sub>3</sub>O<sub>4</sub>, FeO and Fe) were calculated by Gibbs free energy minimization using the HSC chemistry software 6.0 and the thermochemical data of Barin and Platzki.<sup>1</sup> The equilibrium thermodynamics calculations were performed for the i) Fe/O, ii) Cu/O and iii) Fe/Cu/O systems under steam oxidation (molar ratio of Fe:Cu:H<sub>2</sub>O = 3:1:100) and oxygen oxidation (molar ratio of Fe:Cu:O<sub>2</sub> = 3:1:100) conditions, as a function temperature.

- i. **Oxidation in steam:** In the metallic state, there is no alloy formation between Cu and Fe, in line with experimental evidence (XRD and XANES) and literature.<sup>2</sup> A thermodynamic assessment of the steam oxidation of metallic Fe indicates that Fe can be oxidized up to Fe<sub>3</sub>O<sub>4</sub>. The steam oxidation of metallic Cu gives only a small quantity of Cu<sub>2</sub>O (3 %), with the majority being Cu (97 %), indicating that Cu cannot be oxidized to a sensible extent with steam (i.e. no water splitting reaction using Cu according to equilibrium thermodynamic calculations). In the bimetallic Fe-Cu system, the mole fraction of Cu is not affected by the presence of steam (100 %) and Cu<sub>2</sub>O does not form (in line with XRD of Fe<sub>30</sub>Cu<sub>10</sub>Zr<sub>60</sub> after steam oxidation, Figure S4). Fe is oxidized up to Fe<sub>3</sub>O<sub>4</sub>, while the formation of CuFe<sub>2</sub>O<sub>4</sub> or Fe<sub>2</sub>O<sub>3</sub> is thermodynamically not favoured under steam oxidation conditions.
- ii. **Oxidation in O<sub>2</sub>:** For the thermodynamic assessment of the oxidation in O<sub>2</sub>, the reactants were Fe<sub>3</sub>O<sub>4</sub> and Cu. At 700 °C, Fe<sub>3</sub>O<sub>4</sub> is oxidized to Fe<sub>2</sub>O<sub>3</sub> (complete oxidation) in the Fe/O system while Cu was oxidized to CuO in the Cu/O system. The formation of Fe<sub>2</sub>O<sub>3</sub>, CuO and CuFe<sub>2</sub>O<sub>4</sub> is predicted in the Cu/Fe system.

<sup>1</sup> I. Barin, G. Platzki, *Thermochemical data of pure substances*. Wiley Online Library, **1989**; Vol. 304.

<sup>2</sup> A. Bachmaier, M. Kerberb, D. Setman, R. Pippan, *Acta Materialia*, **60**, **2012**, 860-871.

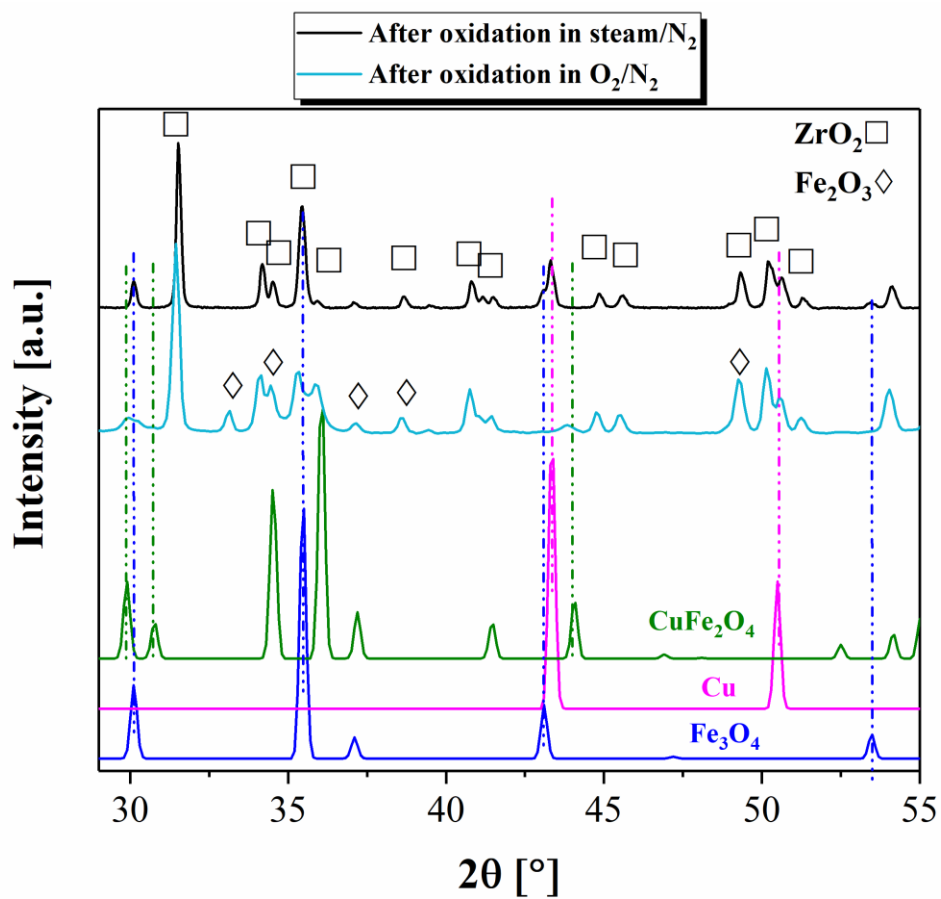

**Figure S4:** XRD patterns of Fe<sub>30</sub>Cu<sub>10</sub>Zr<sub>60</sub> (previously reduced in 2.5 % H<sub>2</sub> in N<sub>2</sub>) subjected to oxidation in steam/N<sub>2</sub> and followed by O<sub>2</sub>/N<sub>2</sub>. Cu is in its metallic state after steam oxidation and CuFe<sub>2</sub>O<sub>4</sub> is formed after oxidation in O<sub>2</sub>/N<sub>2</sub> for 20 min.

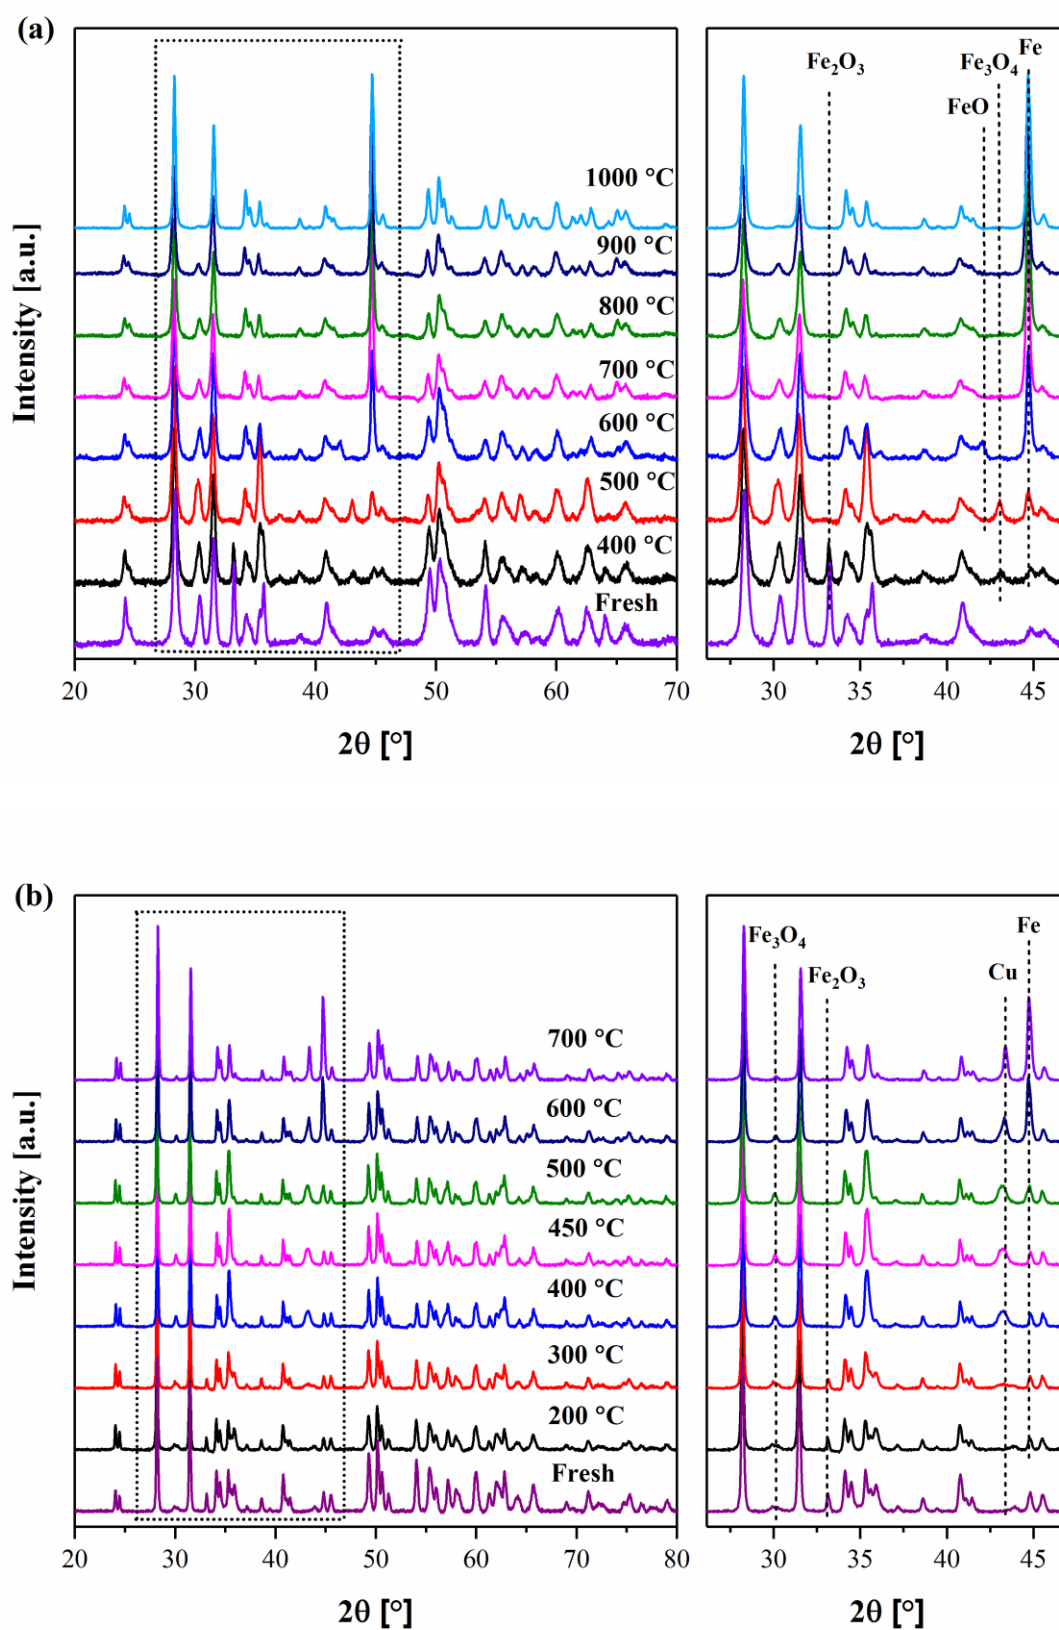

**Figure S5:** Overall XRD series (a) Fe<sub>30</sub>Zr<sub>70</sub> and (b) Fe<sub>30</sub>Cu<sub>10</sub>Zr<sub>60</sub> 30 at room temperature after H<sub>2</sub> reduction at various temperatures in the temperature range from 25 - 1050 °C.

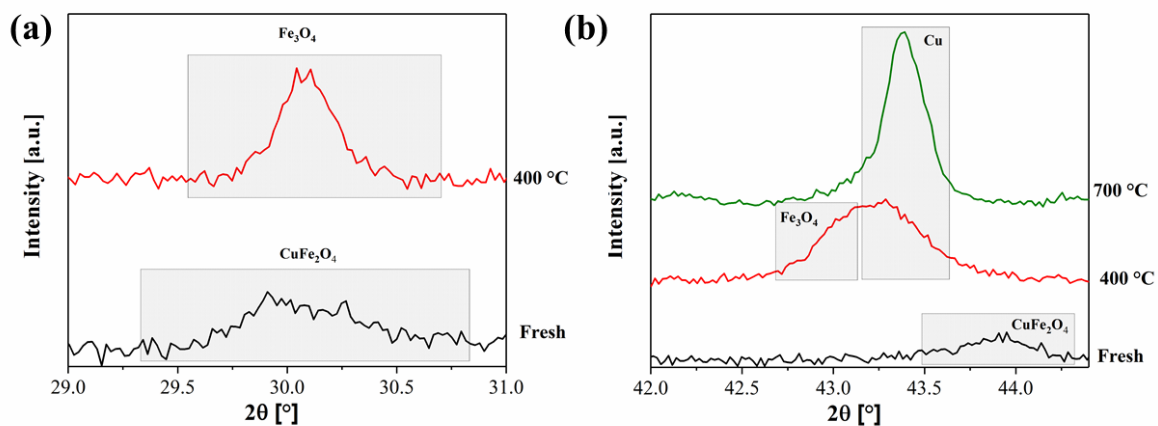

**Figure S6:** XRD series Fe<sub>30</sub>Cu<sub>10</sub>Zr<sub>60</sub> at room temperature after H<sub>2</sub> reduction 400 °C representing CuFe<sub>2</sub>O<sub>4</sub> to Fe<sub>3</sub>O<sub>4</sub> and Cu transition.

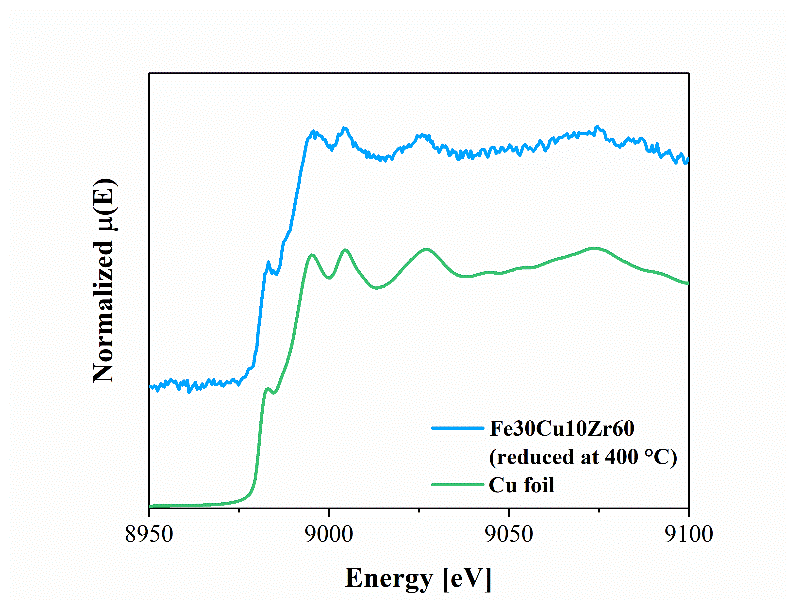

**Figure S7:** Cu-edge XANES spectra of Fe<sub>30</sub>Cu<sub>10</sub>Zr<sub>60</sub> together with Cu foil.



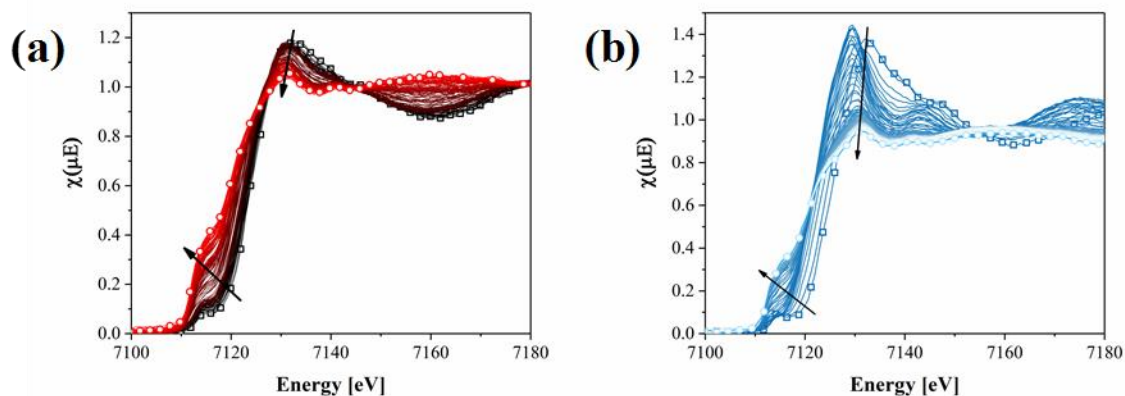

**Figure S8:** Time-resolved Fe K-edge XANES spectra during reduction of (a) Fe<sub>30</sub>Zr<sub>70</sub> and (b) Fe<sub>30</sub>Cu<sub>10</sub>Zr<sub>70</sub> at 750 °C using 5 vol.% H<sub>2</sub> in He. The square (□) and circle (○) symbols correspond to the initial and final states, respectively. The arrows indicate the direction of the changes with time.

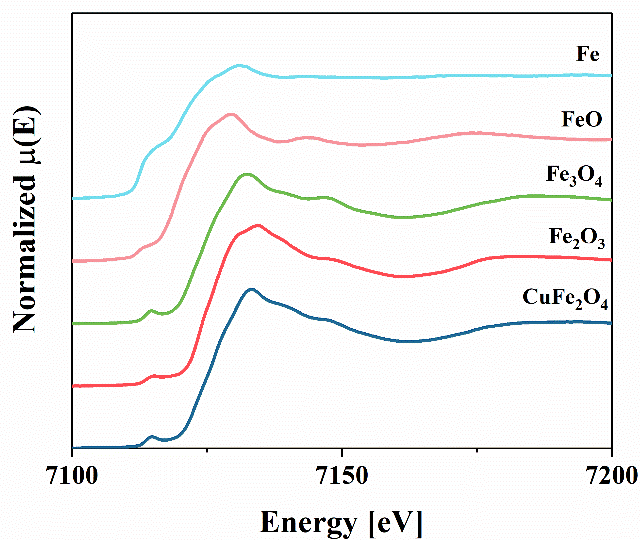

**Figure S9:** (a) Fe K-edge XANES spectra of (—) CuFe<sub>2</sub>O<sub>4</sub> reference, (—) α-Fe<sub>2</sub>O<sub>3</sub> reference, (—) Fe<sub>3</sub>O<sub>4</sub> reference, (—) FeO reference and (—) Fe reference.



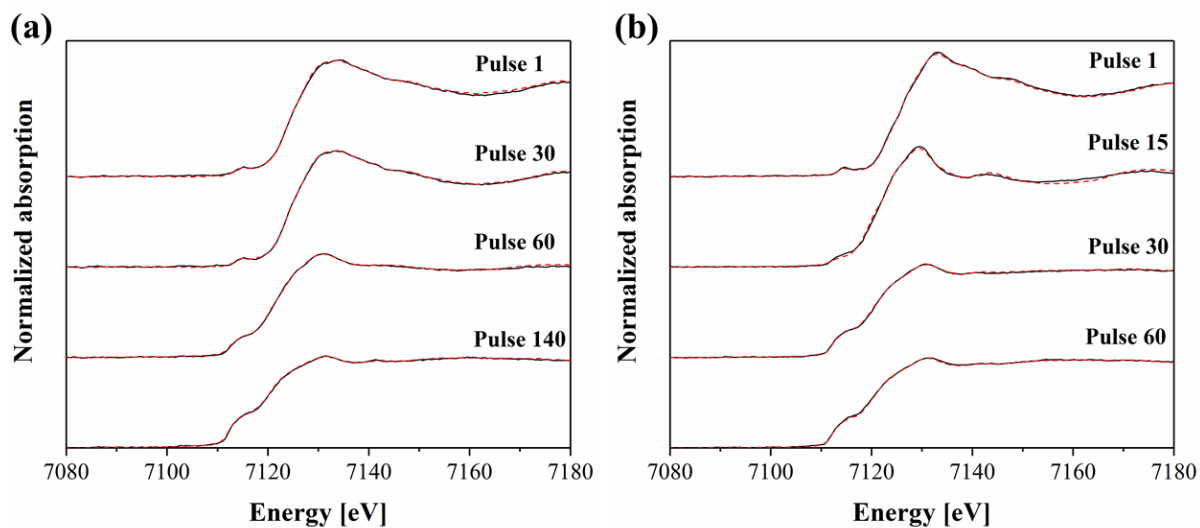

**Figure S10:** Fe K-edge XANES experimental data (solid black) and corresponding fitting using the least-squares linear combination of standard samples (red dash).

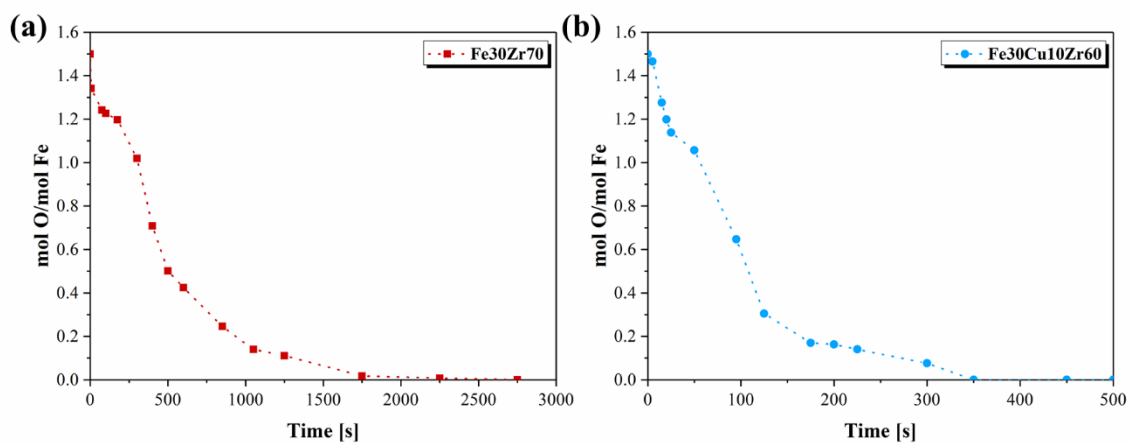

**Figure S11:** The loss of oxygen in (a) Fe<sub>30</sub>Zr<sub>70</sub> and (b) Fe<sub>30</sub>Cu<sub>10</sub>Zr<sub>60</sub> as a function of time.

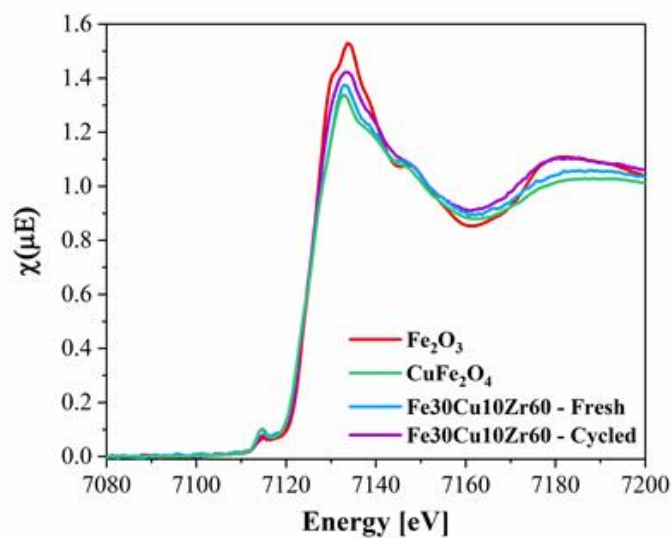

**Figure S12:** Fe-edge XANES spectra of fresh and cycled Fe<sub>30</sub>Cu<sub>10</sub>Zr<sub>60</sub> together with α-Fe<sub>2</sub>O<sub>3</sub> reference and CuFe<sub>2</sub>O<sub>4</sub> reference.

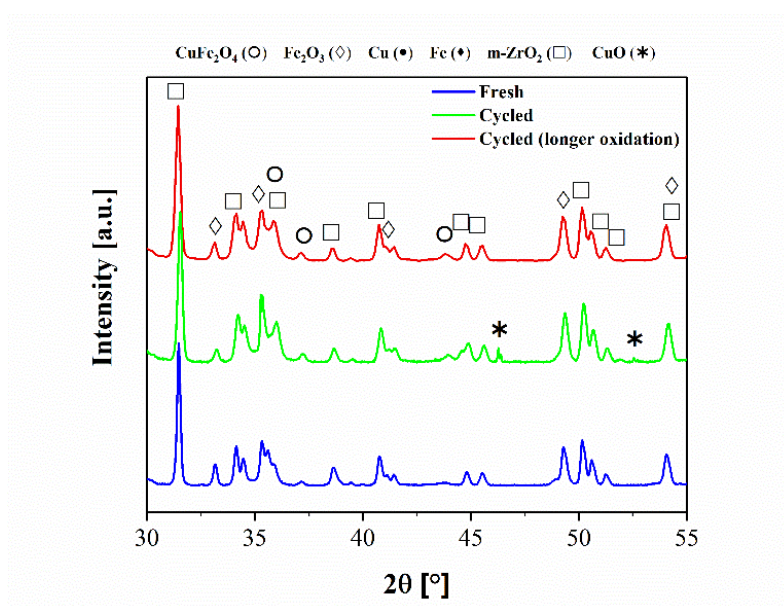

**Figure S13:** XRD of (—) fresh and cycled and oxidized Fe<sub>30</sub>Cu<sub>10</sub>Zr<sub>60</sub>. The oxygen carrier was oxidized for (—) 5 min. and (—) 20 min after being subjected to 15 redox cycles.
